# Supplementary material for: One-pot hydrothermal synthesis and selective etching method of a porous MoSe2 sand rose-like structure for electrocatalytic hydrogen evolution reaction
Source: Royal Society of Chemistry journal article supplement (doi:10.1039/c7ra10001a), 2017-01-01
Supplement: c7ra10001a1.pdf [file c7ra10001a1.pdf]

# One-pot hydrothermal synthesis and selective etching method of porous MoSe<sub>2</sub> sand rose-like structure for electrocatalytic hydrogen evolution reaction

Xuan Thai Tran, Sujittra Poorahong, and Mohamed Siaj \*

*Department of Chemistry and Biochemistry, Université du Québec à Montréal, Montréal  
QC, H3C 3P8, Canada*

\* e-mail: [siaj.mohamed@uqam.ca](mailto:siaj.mohamed@uqam.ca)

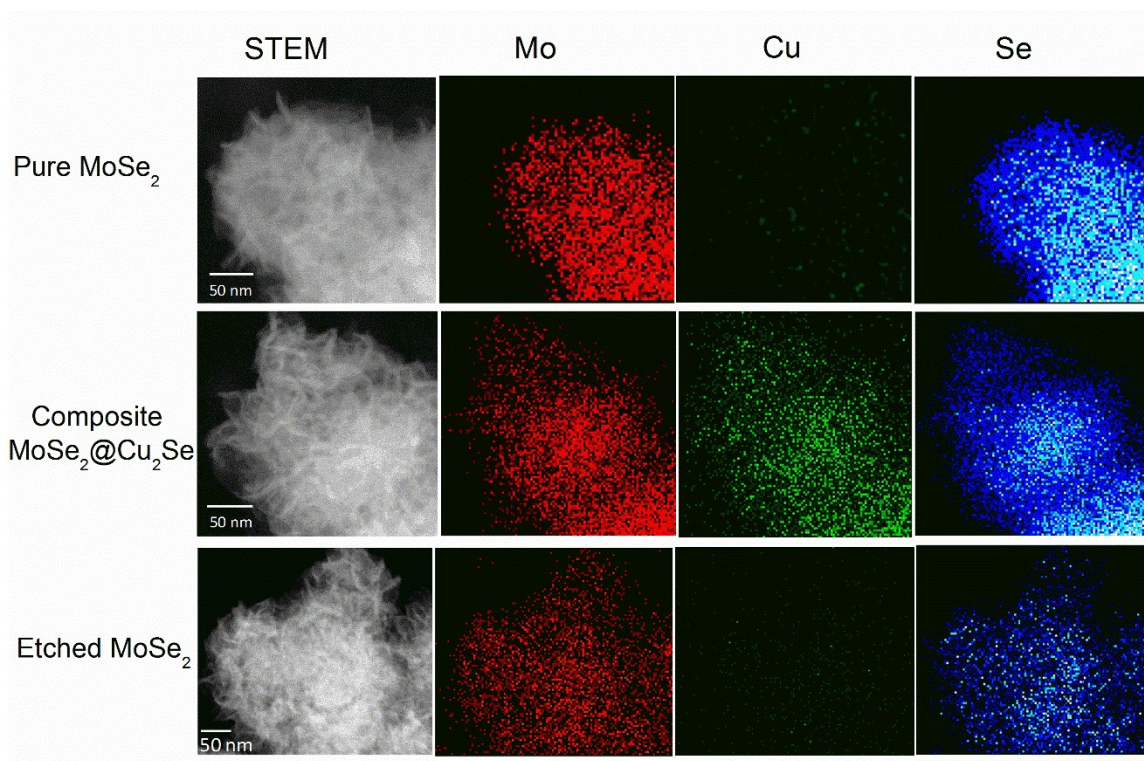

**Supplementary data figure S1** Scanning transmission electron microscope (STEM) images and elemental mapping images of Mo, Cu, and Se components of pure MoSe<sub>2</sub>, composite MoSe<sub>2</sub>@Cu<sub>2</sub>Se and porous MoSe<sub>2</sub> after etching process.

(A)

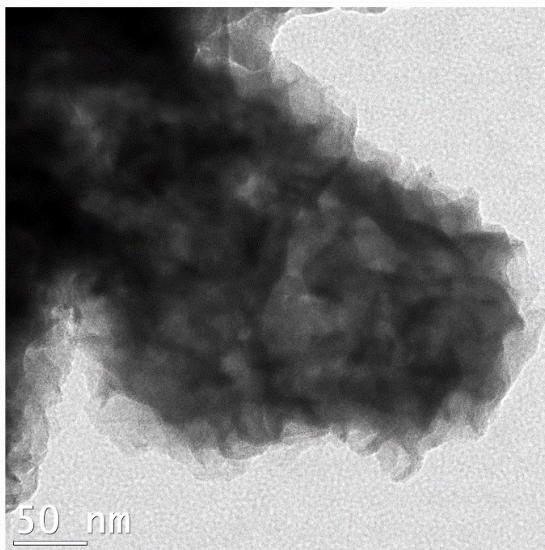

(B)

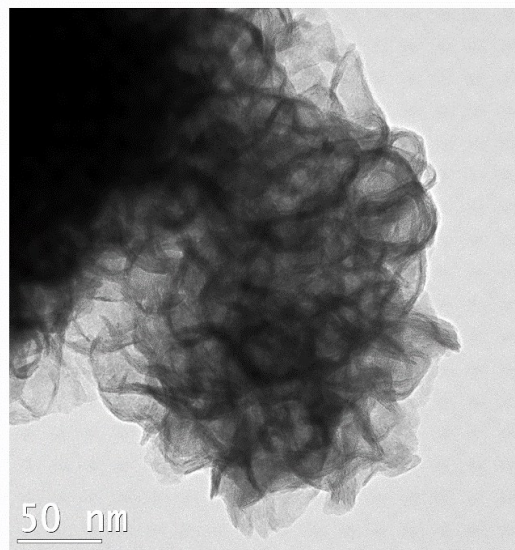

**Supplementary data figure S2** TEM images of (A) pure MoSe<sub>2</sub> and (B) porous MoSe<sub>2</sub> after etching process.

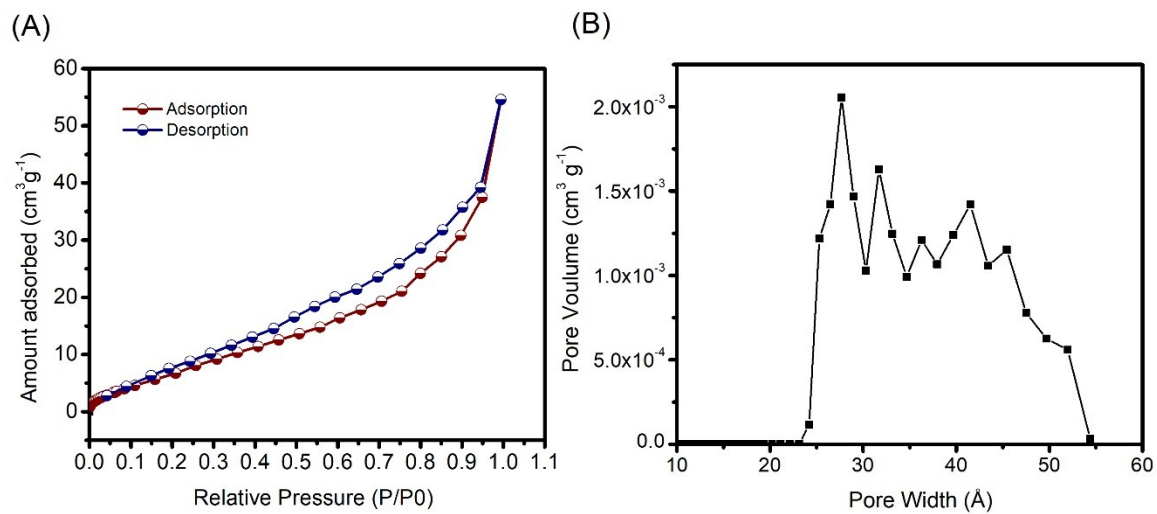

**Supplementary data figure S3** (A) Nitrogen adsorption–desorption isotherm at 77 K and (B) the corresponding density functional theory (DFT) pore-size distribution curve of the porous MoSe<sub>2</sub>.

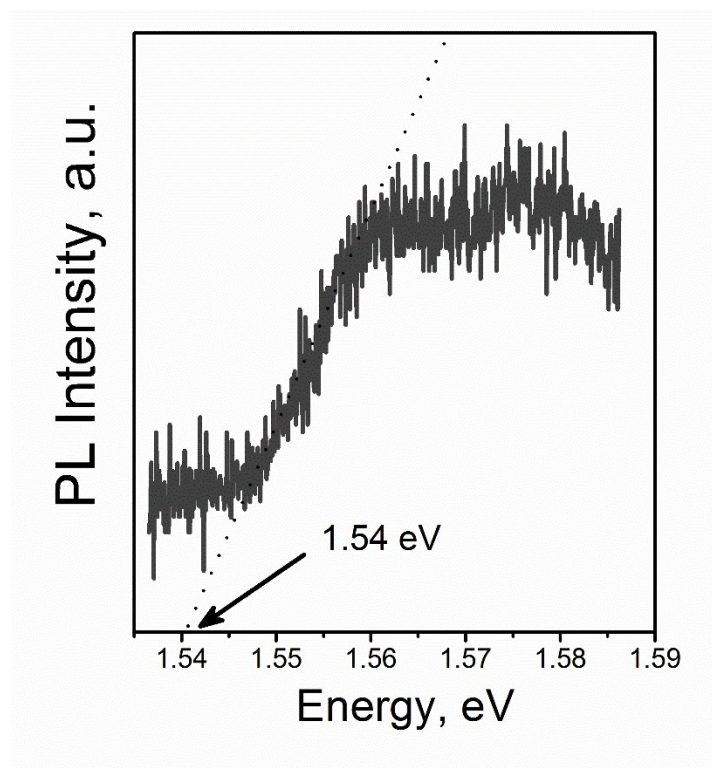

**Supplementary data figure S4** Photoluminescence spectrum of the porous MoSe<sub>2</sub> microspheres showing the presence of excitonic peak at 1.54 eV.

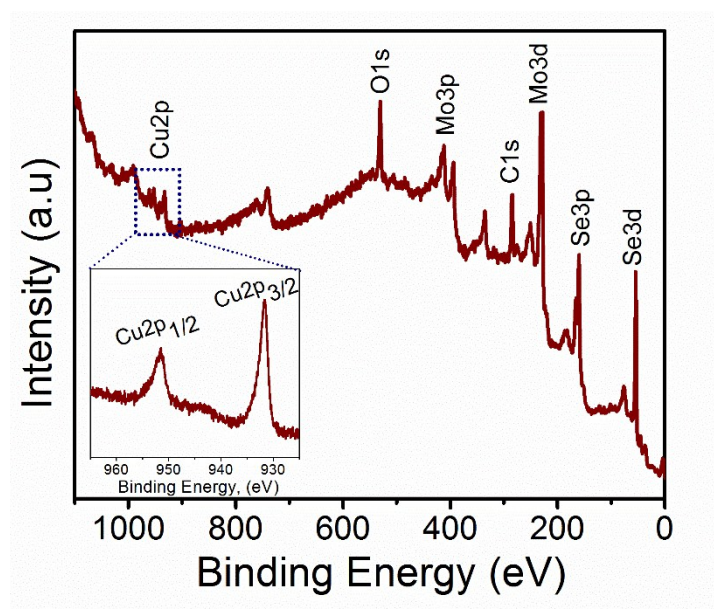

**Supplementary data figure S5** XPS survey spectrum of composite MoSe<sub>2</sub>@Cu<sub>2</sub>Se.
